# Supplementary material
Source: PubMed Central journal article supplement (PMC3775379)
Supplement: NIHMS429609-supplement-01.pdf [file NIHMS429609-supplement-01.pdf]

## Appendix A

### *Descriptive Statistics for Variables Used in Regression Analysis*

|                                                       | <i>2-Years</i> |           | <i>4-Years</i> |           |
|-------------------------------------------------------|----------------|-----------|----------------|-----------|
|                                                       | <i>M or %</i>  | <i>SD</i> | <i>M or %</i>  | <i>SD</i> |
| <b>Arnett Variables</b>                               |                |           |                |           |
| BiFactor IRT Measure                                  | 0.21           | 0.78      | 0.36           | 0.73      |
| <b>Comparison Parenting and Caregiving Measures</b>   |                |           |                |           |
| Two Bags Task: Stimulating/Sensitive                  | 4.99           | 0.69      | 5.10           | 0.66      |
| Two Bags Task: Harsh/Intrusive                        | 1.19           | 0.48      | 1.38           | 0.60      |
| Family Socioeconomic Status                           | 0.02           | 0.78      | -0.01          | 0.83      |
| Teacher/Caregiver Education Level                     | 13.62          | 3.86      | 17.31          | 2.00      |
| Children in Classroom/Home                            | 3.75           | 3.11      | 14.79          | 5.78      |
| Ratio: Children Per Teachers/Caregivers               | 3.14           | 2.68      | 5.79           | 3.26      |
| <b>Child Outcomes</b>                                 |                |           |                |           |
| Cognitive                                             |                |           |                |           |
| BSF-R Mental Score                                    | 128.45         | 10.49     | --             |           |
| Math Composite Score                                  | --             |           | -0.33          | 0.78      |
| Reading Composite Score                               | --             |           | -0.37          | 0.73      |
| Socio-emotional                                       |                |           |                |           |
| BSF-R Social Competence                               | 3.50           | 0.94      | --             |           |
| BSF-R Emotional and Behavioral Regulation             | 3.67           | 0.84      | --             |           |
| BSF-R Attention and Concentration                     | 3.47           | 0.93      | --             |           |
| Child Temperament Index                               | 8.59           | 4.36      | --             |           |
| Parent Report Social Competence                       | --             |           | 4.00           | 0.55      |
| Parent Report Emotional and Behavioral Regulation     | --             |           | 2.42           | 0.47      |
| Parent Report Attention and Concentration             | --             |           | 2.91           | 0.40      |
| Caregiver Report Social Competence                    | --             |           | 3.78           | 0.58      |
| Caregiver Report Emotional and Behavioral Regulation  | --             |           | 1.88           | 0.69      |
| Caregiver Report Attention and Concentration          | --             |           | 2.70           | 0.50      |
| Health                                                |                |           |                |           |
| Excellent Health                                      | 68%            |           | 55%            |           |
| Summary of Absence of Common Illness                  | 2.34           | 0.66      | 2.42           | 0.69      |
| Absence of Injury Requiring Doctor Visit              | 87%            |           | 77%            |           |
| BSF-R Motor Score                                     | 81.62          | 4.85      | --             |           |
| <b>Child-Level Controls</b>                           |                |           |                |           |
| Child is Female                                       | 49%            |           | 49%            |           |
| Child Race                                            |                |           |                |           |
| Hispanic                                              | 22%            |           | 24%            |           |
| Non-Hispanic Black                                    | 16%            |           | 16%            |           |
| Non-Hispanic White                                    | 57%            |           | 53%            |           |
| Non-Hispanic Other                                    | 5%             |           | 7%             |           |
| Low Birth Weight                                      | 6%             |           | 8%             |           |
| Ever Breast Fed                                       | 49%            |           | 71%            |           |
| Two or More Well Baby Check Ups, Since Last Interview | 91%            |           | 80%            |           |
| Received WIC, Since Last Interview                    | 42%            |           | 32%            |           |

Table continues

Appendix A

*Descriptive Statistics for Variables Used in Regression Analysis (continued)*

|                                           | 2-Years       |           | 4-Years       |           |
|-------------------------------------------|---------------|-----------|---------------|-----------|
|                                           | <i>M or %</i> | <i>SD</i> | <i>M or %</i> | <i>SD</i> |
| <b>Lagged Child Outcomes</b>              |               |           |               |           |
| Nine months                               |               |           |               |           |
| Excellent Health                          | 63%           |           | --            |           |
| Summary of Absence of Common Illness      | 0.62          | 0.69      | --            |           |
| Child Temperament Index                   | 3.29          | 1.66      | --            |           |
| Two years                                 |               |           |               |           |
| BSF-R Mental Score                        | --            |           | 127.87        | 10.79     |
| BSF-R Social Competence                   | --            |           | 3.45          | 0.97      |
| BSF-R Emotional and Behavioral Regulation | --            |           | 3.67          | 0.78      |
| BSF-R Attention and Concentration         | --            |           | 3.40          | 0.92      |
| Child Temperament Index                   | --            |           | 8.81          | 4.34      |
| Excellent Health                          | --            |           | 59%           |           |
| Summary of Absence of Common Illness      | --            |           | 2.32          | 0.71      |
| Absence of Injury Requiring Doctor Visit  | --            |           | 83%           |           |
| BSF-R Motor Score                         | --            |           | 81.35         | 5.02      |
| <b>Family-Level Controls</b>              |               |           |               |           |
| Mother Not Born in the US                 | 15%           |           | 18%           |           |
| Any Other Children Ages <6 in Household   | 39%           |           | 48%           |           |
| Any Children Ages 6-18 in Household       | 39%           |           | 54%           |           |
| Mother Married                            | 67%           |           | 65%           |           |
| Mother's Employment Status                |               |           |               |           |
| Full-time                                 | 62%           |           | 44%           |           |
| Part-time                                 | 29%           |           | 19%           |           |
| Not Employed                              | 9%            |           | 38%           |           |
| Mother's Age                              |               |           |               |           |
| Age < 25                                  | 25%           |           | 12%           |           |
| Age 25 - 34                               | 55%           |           | 50%           |           |
| Age 35+                                   | 20%           |           | 38%           |           |
| Received TANF Since Last Interview        | 6%            |           | 10%           |           |
| Received Food Stamps Since Last Interview | 18%           |           | 25%           |           |
| <b>Community-Level Controls</b>           |               |           |               |           |
| Region                                    |               |           |               |           |
| Northeastern Region                       | 18%           |           | 19%           |           |
| Southern Region                           | 34%           |           | 42%           |           |
| Midwestern Region                         | 27%           |           | 20%           |           |
| Western Region                            | 21%           |           | 19%           |           |
| Urbanicity                                |               |           |               |           |
| Urban Area of 50,000 People or More       | 67%           |           | 73%           |           |
| Urban Area of Fewer than 50,000 People    | 16%           |           | 12%           |           |
| Rural Area                                | 18%           |           | 14%           |           |

## Appendix A

*Descriptive Statistics for Variables Used in Regression Analysis (continued)*

|                                                                      | 2-Years       |           | 4-Years       |           |
|----------------------------------------------------------------------|---------------|-----------|---------------|-----------|
|                                                                      | <i>M or %</i> | <i>SD</i> | <i>M or %</i> | <i>SD</i> |
| <b>Child Care Controls</b>                                           |               |           |               |           |
| Teacher/Caregiver is Female                                          | 97%           |           | 97%           |           |
| Teacher/Caregiver's Age                                              | 45.46         | 13.98     | 40.65         | 11.24     |
| Teacher/Caregiver's Race/Ethnicity                                   |               |           |               |           |
| Hispanic                                                             | 24%           |           | 13%           |           |
| Non-Hispanic Black                                                   | 17%           |           | 15%           |           |
| Non-Hispanic White                                                   | 57%           |           | 69%           |           |
| Non-Hispanic Other                                                   | 2%            |           | 3%            |           |
| Experience in Child Care (Years)                                     | 9.72          | 9.04      | 13.10         | 0.98      |
| Certification in Early Childhood Education <sup>a</sup>              | 11%           |           | 3.21          | 0.98      |
| Hours per Week Child is Cared for at the Observed Child Care Setting | 37.28         | 15.94     | 23.35         | 12.17     |
| Months Child has been Cared for at the Observed Child Care Setting   | 15.76         | 7.80      | 7.78          | 8.01      |
| Center Type                                                          |               |           |               |           |
| Head Start                                                           | --            |           | 17%           |           |
| Public School                                                        | --            |           | 26%           |           |
| Private School                                                       | --            |           | 21%           |           |
| Religious School/Church                                              | --            |           | 13%           |           |
| Community Non-profit                                                 | --            |           | 11%           |           |
| Community For-profit                                                 | --            |           | 13%           |           |
| Center is Accredited                                                 | --            |           | 48%           |           |
| License Status and Size                                              |               |           |               |           |
| Not Licensed                                                         | --            |           | 19%           |           |
| Licensed for 50 or Fewer Children                                    | --            |           | 26%           |           |
| Licenses for 50-100 Children                                         | --            |           | 21%           |           |
| Licenses for More than 100 Children                                  | --            |           | 35%           |           |
| Center Accepts Subsidies                                             | --            |           | 46%           |           |

*Note.* At 2 years,  $n = 650$  except for Two Bags Task Parenting ( $n = 550$ ) and BSF-R ( $n = 600$ ). At 4 years,  $n = 1,000$ , except for Two Bags Task Parenting ( $n = 950$ ). <sup>a</sup> Certification is a dichotomous indicator of any certificates in early childhood education or related fields (other areas of education, nursing, social work, or psychology) at 2 years; and, the sum of five indicators of whether the teacher had various coursework or credentials in early childhood education at 4 years. Values weighted by the ECLS-B sampling weight.
