# Supplementary material
Source: PubMed Central journal article supplement (PMC3775379)
Supplement: NIHMS429609-supplement-02.pdf [file NIHMS429609-supplement-02.pdf]

Table B1

*Measures of Fit from the Bi-factor, One-, Two- and Three-factor Confirmatory Factor Analyses Based on Unweighted Data for the Centers*

|                                                    | Bi-factor    | One Factor | Two Factors<br>(Original) | Two Factors<br>(Modified) <sup>a</sup> | Three factors |
|----------------------------------------------------|--------------|------------|---------------------------|----------------------------------------|---------------|
| Number of Items                                    | 26           | 26         | 26                        | 26                                     | 26            |
| Scaled Chi-Square                                  | 2599.785     | 13239.152  | 8607.103                  | 6612.250                               | 7932.148      |
| d.f. for Chi-square                                | 273          | 299        | 298                       | 298                                    | 296           |
| P-value                                            | <.001        | <.001      | <.001                     | <.001                                  | <.001         |
| Scaling Correction Factor                          | 0.369        | 0.475      | 0.468                     | 0.466                                  | 0.455         |
| Comparative Fit Index (CFI)                        | <b>0.991</b> | 0.949      | 0.967                     | 0.975                                  | 0.970         |
| Non-normed Fit Index (NNFI)                        | <b>0.989</b> | 0.944      | 0.964                     | 0.973                                  | 0.967         |
| Root Mean Square Error Of Approximation<br>(RMSEA) | <b>0.08</b>  | 0.180      | 0.145                     | 0.126                                  | 0.139         |
| Weighted Root Mean Square Residual<br>(WRMR)       | <b>1.543</b> | 3.949      | 3.160                     | 2.764                                  | 2.993         |

*Note.* The results based on unweighted data. Factor structures based on conceptual layout of items in Table 1 of the original manuscript. The three-factor combines Permissiveness and Harshness in one factor, the two-factor combines Permissiveness and Harshness for the first factor and Sensitivity and Detachment for the second factor. The four-factor structure shown in Table 1 failed to converge, and thus no results are shown for it.

<sup>a</sup>Item 18 and 24 placed on the Sensitivity/Detachment combined factor.

Table B2

*Measures of Fit from the Bi-factor, One-, Two- and Three-factor Confirmatory Factor Analyses Based on Weighted Data for the Centers*

|                                                    | Bi-factor    | One Factor | Two Factors<br>(Original) | Two Factors<br>(Modified) <sup>a</sup> | Three factors |
|----------------------------------------------------|--------------|------------|---------------------------|----------------------------------------|---------------|
| Number of Items                                    | 26           | 26         | 26                        | 26                                     | 26            |
| Scaled Chi-Square                                  | 1055.634     | 4331.542   | 2849.498                  | 2215.570                               | 2656.706      |
| d.f. for Chi-square                                | 273          | 299        | 298                       | 298                                    | 296           |
| P-value                                            | <.001        | <.001      | <.001                     | <.001                                  | <.001         |
| Scaling Correction Factor                          | 0.424        | 0.520      | 0.516                     | 0.514                                  | 0.507         |
| Comparative Fit Index (CFI)                        | <b>0.992</b> | 0.957      | 0.973                     | 0.979                                  | 0.975         |
| Non-normed Fit Index (NNFI)                        | <b>0.990</b> | 0.953      | 0.970                     | 0.978                                  | 0.972         |
| Root Mean Square Error Of Approximation<br>(RMSEA) | <b>0.046</b> | 0.101      | 0.080                     | 0.070                                  | 0.077         |
| Weighted Root Mean Square Residual<br>(WRMR)       | <b>1.054</b> | 2.364      | 1.909                     | 1.681                                  | 1.829         |

*Note.* The results based on weighted data. Factor structures based on conceptual layout of items in Table 1 of the original manuscript. The three-factor combines Permissiveness and Harshness in one factor, the two-factor combines Permissiveness and Harshness for the first factor and Sensitivity and Detachment for the second factor. The four-factor structure shown in Table 1 failed to converge, and thus no results are shown for it.

<sup>a</sup>Item 18 and 24 placed on the Sensitivity/Detachment combined factor.

Table B3

*Measures of Fit from the Bi-factor, One-, Two- and Three-factor Confirmatory Factor Analyses Based on Unweighted Data for the Homes*

|                                                    | Bi-factor    | One Factor | Two Factors<br>(Original) | Two Factors<br>(Modified) <sup>a</sup> | Three factors |
|----------------------------------------------------|--------------|------------|---------------------------|----------------------------------------|---------------|
| Number of Items                                    | 26           | 26         | 26                        | 26                                     | 26            |
| Scaled Chi-Square                                  | 1486.171     | 7616.072   | 5134.164                  | 3879.274                               | 4590.086      |
| d.f. for Chi-square                                | 273          | 299        | 298                       | 298                                    | 296           |
| P-value                                            | <.001        | <.001      | <.001                     | <.001                                  | <.001         |
| Scaling Correction Factor                          | 0.442        | 0.561      | 0.559                     | 0.552                                  | 0.548         |
| Comparative Fit Index (CFI)                        | <b>0.988</b> | 0.926      | 0.951                     | 0.964                                  | 0.956         |
| Non-normed Fit Index (NNFI)                        | <b>0.985</b> | 0.919      | 0.946                     | 0.960                                  | 0.952         |
| Root Mean Square Error Of Approximation<br>(RMSEA) | <b>0.078</b> | 0.182      | 0.148                     | 0.128                                  | 0.140         |
| Weighted Root Mean Square Residual<br>(WRMR)       | <b>1.277</b> | 3.255      | 2.669                     | 2.306                                  | 2.498         |

*Note.* The results based on unweighted data. Factor structures based on conceptual layout of items in Table 1 of the original manuscript. The three-factor combines Permissiveness and Harshness in one factor, the two-factor combines Permissiveness and Harshness for the first factor and Sensitivity and Detachment for the second factor. The four-factor structure shown in Table 1 failed to converge, and thus no results are shown for it.

<sup>a</sup>Item 18 and 24 placed on the Sensitivity/Detachment combined factor.

Table B4

*Measures of Fit from the Bi-factor, One-, Two- and Three-factor Confirmatory Factor Analyses Based on Weighted Data for the Homes*

|                                                    | Bi-factor    | One Factor | Two Factors<br>(Original) | Two Factors<br>(Modified) <sup>a</sup> | Three factors |
|----------------------------------------------------|--------------|------------|---------------------------|----------------------------------------|---------------|
| Number of Items                                    | 26           | 26         | 26                        | 26                                     | 26            |
| Scaled Chi-Square                                  | 1227.947     | 5409.930   | 3660.033                  | 2860.183                               | 3283.911      |
| d.f. for Chi-square                                | 273          | 299        | 298                       | 298                                    | 296           |
| P-value                                            | <.001        | <.001      | <.001                     | <.001                                  | <.001         |
| Scaling Correction Factor                          | 0.486        | 0.618      | 0.619                     | 0.611                                  | 0.608         |
| Comparative Fit Index (CFI)                        | <b>0.986</b> | 0.927      | 0.952                     | 0.963                                  | 0.957         |
| Non-normed Fit Index (NNFI)                        | <b>0.984</b> | 0.921      | 0.948                     | 0.960                                  | 0.953         |
| Root Mean Square Error Of Approximation<br>(RMSEA) | <b>0.069</b> | 0.152      | 0.124                     | 0.108                                  | 0.117         |
| Weighted Root Mean Square Residual<br>(WRMR)       | <b>1.217</b> | 2.881      | 2.371                     | 2.083                                  | 2.226         |

*Note.* The results based on unweighted data. Factor structures based on conceptual layout of items in Table 1 of the original manuscript. The three-factor combines Permissiveness and Harshness in one factor, the two-factor combines Permissiveness and Harshness for the first factor and Sensitivity and Detachment for the second factor. The four-factor structure shown in Table 1 failed to converge, and thus no results are shown for it.

<sup>a</sup>Item 18 and 24 placed on the Sensitivity/Detachment combined factor.

Table B5

*Correlations between the Bi-Factor Measures and the Arnett CIS Raw Scores*

|                         | <i>Bi-factor Generalized Partial Credit Model</i> |                            |
|-------------------------|---------------------------------------------------|----------------------------|
|                         | Homes<br>(2-Year Sample)                          | Centers<br>(4-Year Sample) |
| Raw Scores              |                                                   |                            |
| Total Score             | .90*                                              | .90*                       |
| Sensitivity Subscale    | .94*                                              | .96*                       |
| Harshness Subscale      | .43*                                              | .62*                       |
| Detachment Subscale     | .68*                                              | .59*                       |
| Permissiveness Subscale | .46*                                              | .64*                       |

*Note.*  $n = 650$  at 2-years.  $n = 1,050$  at 4-years.

Table B6

*Standardized Regression Coefficients for Child Outcomes Predicted by the Arnett CIS Bi-factor Measure and Total Raw Score in Home-Based Child Care (2-Year Sample).*

|                                                     | Arnett CIS<br>Bi-factor IRT Measure | Arnett CIS<br>Total Raw Score |
|-----------------------------------------------------|-------------------------------------|-------------------------------|
| <b>Cognitive</b>                                    |                                     |                               |
| BSF-R Mental Score                                  | .11*                                | .12*                          |
| <b>Socio-Emotional</b>                              |                                     |                               |
| BSF-R Social Competence                             | .15*                                | .14*                          |
| BSF-R Emotional and Behavioral Regulation           | .15*                                | .14*                          |
| BSF-R Attention and Concentration                   | .14*                                | .14*                          |
| Child Temperament Index                             | -.05                                | -.04                          |
| <b>Health</b>                                       |                                     |                               |
| Child Excellent Health <sup>a</sup>                 | -.01                                | .00                           |
| Summary Score: Absence of Illnesses                 | .00                                 | -.04                          |
| No Injury that Required Doctor's Visit <sup>a</sup> | .01                                 | .00                           |
| BSF-R Motor Score                                   | .02                                 | -.01                          |

*Note.*  $n = 650$  in all cases except the BSF-R measures, where  $n = 600$ . Values are standardized regression coefficients from models that adjust for the child, family, community and child care covariates listed in Appendix A. Each cell represents a separate regression, with the child outcome listed in the row and the focal predictor listed in the column. Results weighted by the ECLS-B sampling weight (W22P0).<sup>a</sup> For dichotomous outcomes, values are changes in predicted probabilities for a one standard deviation increase in the predictor of interest, centered at the mean, with all covariates at their means. \*  $p < .05$ .

Table B7

*Standardized Regression Coefficients for Child Outcomes Predicted by the Arnett CIS Bifactor Measure and Total Raw Score in Center-Based Child Care (4-Year Sample).*

|                                                     | Arnett CIS<br>Bi-factor IRT Measure | Arnett CIS<br>Total Raw Score |
|-----------------------------------------------------|-------------------------------------|-------------------------------|
| <b>Cognitive</b>                                    |                                     |                               |
| Math Composite Score                                | -.01                                | -.01                          |
| Reading Composite Score                             | .03                                 | .01                           |
| <b>Socio-Emotional</b>                              |                                     |                               |
| Parent Report                                       |                                     |                               |
| Social Competence                                   | .04                                 | .00                           |
| Emotional and Behavioral Regulation                 | -.02                                | -.05                          |
| Attention and Concentration                         | -.02                                | -.07                          |
| Teacher Report                                      |                                     |                               |
| Social Competence                                   | .00                                 | .03                           |
| Emotional and Behavioral Regulation                 | .04                                 | -.01                          |
| Attention and Concentration                         | .05                                 | .01                           |
| <b>Health</b>                                       |                                     |                               |
| Child Excellent Health <sup>a</sup>                 | .02                                 | .03                           |
| Summary Score: Absence of Illnesses                 | .02                                 | .00                           |
| No Injury that Required Doctor's Visit <sup>a</sup> | .06*                                | .05*                          |

*Note.*  $n = 1,000$  in all cases. Values are standardized regression coefficients from models that adjust for the child, family, community and child care covariates listed in Appendix A. Each cell represents a separate regression, with the child outcome listed in the row and the focal predictor listed in the column. Results weighted by the ECLS-B sampling weight (W33P0). <sup>a</sup>For dichotomous outcomes, values are changes in predicted probabilities for a one standard deviation increase in the predictor of interest, centered at the mean, with all covariates at their means. \*  $p < .05$ .
